# Supplementary material
Source: PubMed Central journal article supplement (PMC3971369)
Supplement: NIHMS57577-supplement-Bayer_et_al__suppl__data.pdf [file NIHMS57577-supplement-Bayer_et_al__suppl__data.pdf]

## Bayer et al. Suppl. Table S1

**Suppl. Table 1.** Overview of predicted chloroplast-localised protein kinases

| Kinase | AGI       | TargetP | Plastid localization predicted by <sup>1)</sup> | Reference                                                               |
|--------|-----------|---------|-------------------------------------------------|-------------------------------------------------------------------------|
| Kin 1  | At1g14370 | 0,975   | LOCtree, MultiLoc, TargetP                      | (Stael <i>et al.</i> , 2011)                                            |
| Kin 2  | At2g02800 | 0,978   | LOCtree, MultiLoc, TargetP                      | (Stael <i>et al.</i> , 2011)                                            |
| Kin 3  | At2g17220 | 0,973   | iPSORT, LOCtree, MultiLoc, Predotar, TargetP... | (Stael <i>et al.</i> , 2011; Schliebner <i>et al.</i> , 2008)           |
| Kin 4  | At4g35600 | 0,932   | iPSORT, LOCtree, MultiLoc, Predotar, TargetP    | (Stael <i>et al.</i> , 2011)                                            |
| Kin 5  | At1g26970 | 0,911   | LOCtree, Predotar, TargetP, WoLFPSORT           | this study                                                              |
| Kin 6  | At1g53050 | 0,976   | MultiLoc, TargetP, PredSL                       | this study                                                              |
| Kin 7  | At1g69790 | 0,968   | LOCtree, TargetP, PredSL                        | this study                                                              |
| Kin 8  | At1g72540 | 0,976   | LOCtree, TargetP, WoLFPSORT                     | this study                                                              |
| Kin 9  | At3g44610 | 0,824   | LOCtree, TargetP, PredSL                        | this study                                                              |
| Kin 10 | At1g71530 | 0,769   | LOCtree, MultiLoc, Predotar, TargetP, WoLFPSORT | this study                                                              |
| ABC1K1 | At1g71810 | 0,461   | iPSORT, LOCtree, TargetP, WoLFPSORT             | this study, (Zybailov <i>et al.</i> , 2008)                             |
| ABC1K2 | At1g79600 | 0,773   | Predotar, TargetP, WoLFPSORT                    | this study, (Zybailov <i>et al.</i> , 2008; Ferro <i>et al.</i> , 2010) |
| ABC1K3 | At4g31390 | 0,939   | LOCtree, MultiLoc, Predotar, TargetP, WoLFPSORT | this study                                                              |
| CPK3   | At4g23650 | 0,949   | MultiLoc, TargetP, WoLFPSORT                    | (Mehlmer <i>et al.</i> , 2010)                                          |
| CPK16  | At2g17890 | 0,939   | MultiLoc, Predotar, TargetP, WoLFPSORT          | (Stael <i>et al.</i> , 2011)                                            |
| CIPK13 | At2g34180 | 0,576   | iPSORT, MultiLoc, Predotar, TargetP             | (Schliebner <i>et al.</i> , 2008)                                       |

<sup>1)</sup> Targeting prediction taken from the SUBA database (<http://suba.plantenergy.uwa.edu.au/>) (Heazlewood *et al.*, 2007), and the PredSL server: (<http://hannibal.biol.uoa.gr/PredSL/index.html>) (Petsalaki *et al.*, 2006)

### References:

**Ferro M, Brugiere S, Salvi D, Seigneurin-Berny D, Court M, Moyet L, Ramus C, Miras S, Mellal M, Le Gall S, Kieffer-Jaquinod S, Bruley C, Garin J, Joyard J, Masselon C, Rolland N.** 2010. AT\_CHLORO, a comprehensive chloroplast proteome database with subplastidial localization and curated information on envelope proteins. *Mol Cell Proteomics* **9**, 1063-1084.

**Heazlewood JL, Verboom RE, Tonti-Filippini J, Small I, Millar AH.** 2007. SUBA: the Arabidopsis Subcellular Database. *Nucleic Acids Res* **35**, D213-218.

**Mehlmer N, Wurzinger B, Stael S, Hofmann-Rodrigues D, Csaszar E, Pfister B, Bayer R, Teige M.** 2010. The Ca<sup>2+</sup>-dependent protein kinase CPK3 is required for MAPK-independent salt-stress acclimation in Arabidopsis. *Plant J* **63**, 484-498.

**Petsalaki EI, Bagos PG, Litou ZI, Hamodrakas SJ.** 2006. PredSL: a tool for the N-terminal sequence-based prediction of protein subcellular localization. *Genomics Proteomics Bioinformatics* **4**, 48-55.

**Schliebner I, Pribil M, Zuhlke J, Dietzmann A, Leister D.** 2008. A Survey of Chloroplast Protein Kinases and Phosphatases in Arabidopsis thaliana. *Curr Genomics* **9**, 184-190.

**Stael S, Bayer RG, Mehlmer N, Teige M.** 2011. Protein N-acylation overrides differing targeting signals. *FEBS Lett* **585**, 517-522.

**Zybailov B, Rutschow H, Friso G, Rudella A, Emanuelsson O, Sun Q, van Wijk KJ.** 2008. Sorting signals, N-terminal modifications and abundance of the chloroplast proteome. *PLoS One* **3**, e1994.

*Bayer et al. Suppl. Fig S1*

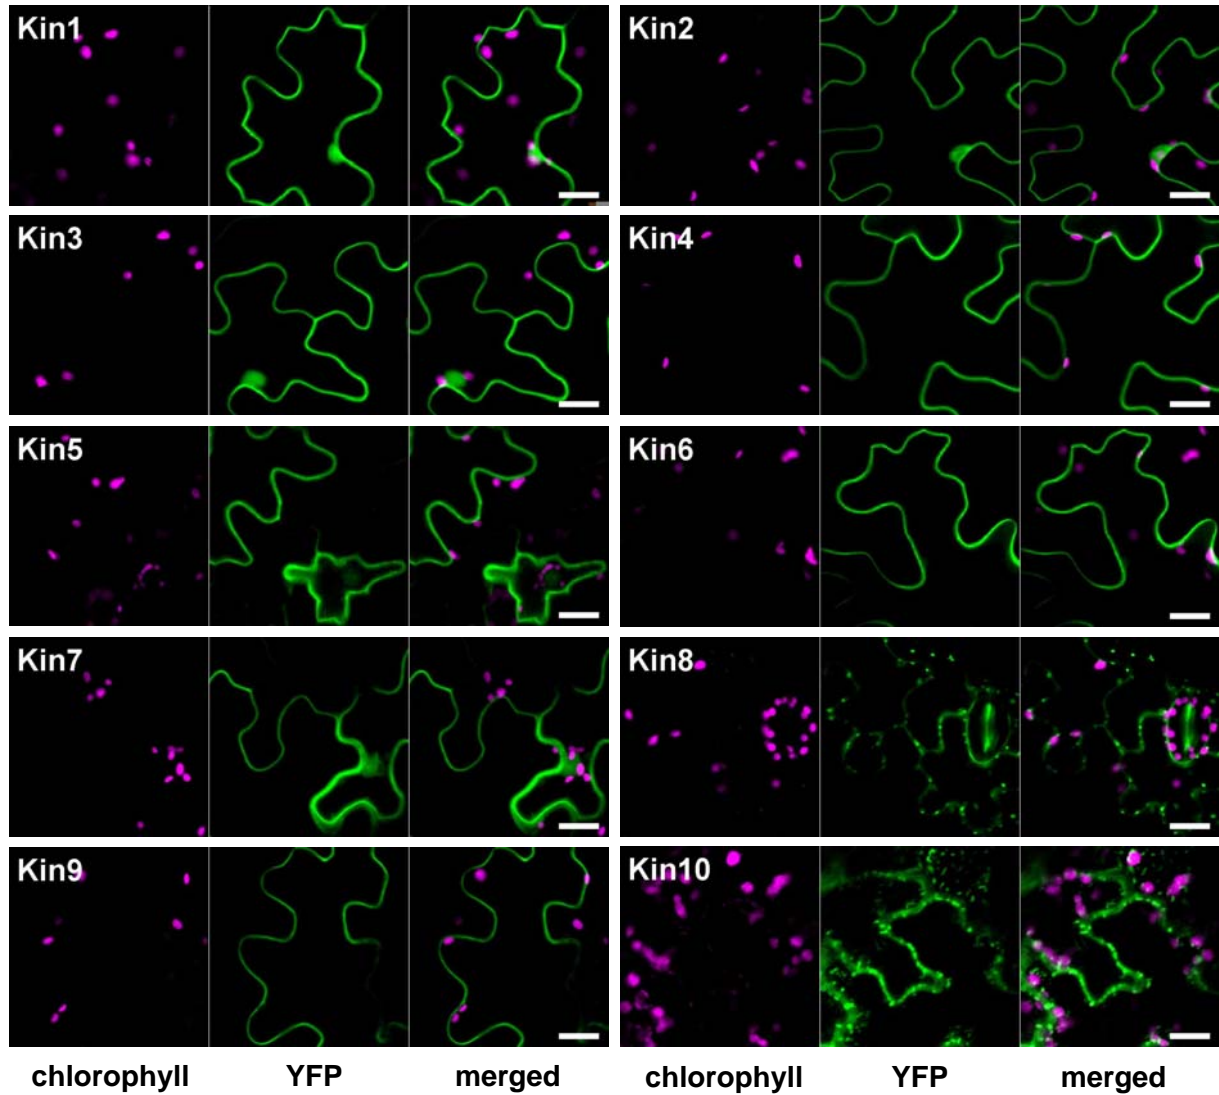

**Suppl. Fig. S1.** Localisation analysis of predicted chloroplast-localised protein kinases. Tobacco leaves infiltrated with genes of interest fused in front of YFP in the plant expression plasmid pBIN19 were analyzed by confocal laser scanning microscopy two days after infiltration. Chlorophyll autofluorescence (magenta) is shown in the first channel and the YFP signal (green) in the second channel. The third channel shows the merged image. Scale bar = 20 $\mu$ m.
